# Supplementary material for: Moral Intensity and Ethical Sensitivity: A Vignette-Level Analysis of Ethical Principle Recognition and Ethical Sensitivity Skills in Pre-Service Therapeutic Sciences Clinicians
Source: Research Square preprint supplement (doi:10.21203/rs.3.rs-8658425/v1), 2026-01-28
Supplement: Supplementary file 1 [file 4b27ef03cd9ba4551ebaba3e.docx]

**Supplementary table s1: Moral Intensity Dimension Ratings Across Clinical Vignettes**

| **Vignette** | **Magnitude of consequences** | **Social consensus** | **Probability of effect** | **Temporal immediacy** | **Proximity** | **Concentration of effect** | **Total score** | **Total score (%)** |
| --- | --- | --- | --- | --- | --- | --- | --- | --- |
| 1 | 2 | 4 | 5 | 4 | 4 | 1 | 20 | 67 |
| 2 | 4 | 5 | 4 | 4 | 5 | 4 | 26 | 87 |
| 3 | 4 | 4 | 4 | 3 | 4 | 4 | 23 | 77 |
| 4 | 5 | 5 | 4 | 3 | 5 | 5 | 27 | 90 |
| 5 | 4 | 5 | 3 | 3 | 4 | 3 | 22 | 73 |
| 6 | 3 | 4 | 4 | 3 | 4 | 4 | 22 | 73 |
| 7 | 4 | 4 | 4 | 4 | 5 | 4 | 25 | 83 |
| 8 | 3 | 4 | 4 | 3 | 4 | 4 | 22 | 73 |
| 9 | 5 | 5 | 5 | 4 | 4 | 5 | 28 | 93 |
| 10 | 4 | 5 | 4 | 3 | 5 | 4 | 25 | 83 |
| 11 | 4 | 5 | 5 | 3 | 4 | 5 | 26 | 87 |
| 12 | 4 | 5 | 4 | 3 | 4 | 4 | 24 | 80 |

*Note.* Moral intensity dimensions were rated using Jones’s (1991) six-dimension framework on a 5-point Likert scale (1 = very low, 5 = very high). Total scores represent the sum of all six dimensions (possible range = 6–30). Percentage scores reflect total score expressed as a proportion of the maximum possible score.
